# Supplementary material for: Evaluating endoscopic ultrasound-guided tissue acquisition for diagnosis of small pancreatic neuroendocrine neoplasms
Source: PubMed Central journal article supplement — Endosc Int Open. 2024 Nov 28;12(11):E1379–85. doi: 10.1055/a-2422-9363 (PMC11604306; doi:10.1055/a-2422-9363), 2024-11-28
Supplement: 10-1055-a-2422-9363_24600640.pdf [file 10-1055-a-2422-9363_24600640.pdf]

## Supplementary material

**Supplementary Table 1** Univariate and multivariate analyses of factors associated with the correct diagnosis of p-NEN using EUS-TA for 82 p-NENs.

| Variable               | No. of correct diagnoses | Univariate OR (95% CI) | Multivariate OR (95% CI) |
|------------------------|--------------------------|------------------------|--------------------------|
| Tumor size             |                          |                        |                          |
| ≤ 10 mm                | 29                       | 1                      | 1                        |
| 10-20 mm               | 29                       | 1.00 (0.060-6.76)      | 0.21 (0.01-.93)          |
| > 20 mm                | 20                       | 0.34 (0.03-4.07)       | 0.46 (0.01-13.51)        |
| Cystic component       |                          |                        |                          |
| Absent                 | 75                       | 1                      | 1                        |
| Present                | 3                        | 0.12 (0.01-1.52)       | -                        |
| Tumor location         |                          |                        |                          |
| Head                   | 25                       | 1                      | 1                        |
| Body                   | 26                       | 0.35 (0.03-3.56)       | -                        |
| Tail                   | 27                       | -                      | -                        |
| Needle type            |                          |                        |                          |
| FNA                    | 2                        | 1                      | 1                        |
| FNB                    | 76                       | 12.21 (0.86-173.36)    | -                        |
| Needle gauge           |                          |                        |                          |
| 25G                    | 6                        | 1                      | 1                        |
| 22G                    | 72                       | 4.00 (0.36-44.6)       | -                        |
| Number of punctures    |                          |                        |                          |
| 1 time                 | 12                       | 1                      | 1                        |
| 2 times                | 53                       | 4.42 (0.56-34.57)      | -                        |
| 3 times                | 13                       | -                      | -                        |
| Puncture site          |                          |                        |                          |
| Transgastric           | 59                       | 1                      | 1                        |
| Transduodenal bulb     | 1                        | -                      | -                        |
| Transduodenal 2nd part | 18                       | 1.14 (0.11-11.65)      | -                        |

EUS-TA, endoscopic ultrasound-guided tissue acquisition; FNA, fine-needle aspiration; FNB, fine-needle biopsy; OR, odds ratio; p-NEN, pancreatic neuroendocrine neoplasm; 95% CI, 95% confidence interval.

## Supplementary material

**Supplementary Table 2** Univariate and multivariate analyses of factors associated with the correct diagnosis of concordance of p-NET grading between EUS-TA and surgical specimen 44 p-NETs.

| Variable               | No. correct diagnoses | Univariate<br>OR (95% CI) | Multivariate<br>OR (95% CI) |
|------------------------|-----------------------|---------------------------|-----------------------------|
| Tumor size             |                       |                           |                             |
| ≤ 10 mm                | 17                    | 1                         | 1                           |
| 10-20 mm               | 14                    | 0.27 (0.03-2.94)          | 0.49 (0.03-7.06)            |
| > 20 mm                | 7                     | 0.21 (0.02-2.65)          | 0.18 (0.01-3.30)            |
| Cystic component       |                       |                           |                             |
| Absent                 | 0                     | -                         | -                           |
| Present                | 38                    | -                         | -                           |
| Tumor location         |                       |                           |                             |
| Head                   | 12                    | 1                         | 1                           |
| Body                   | 12                    | -                         | -                           |
| Tail                   | 14                    | 0.58 (0.09-3.76)          | -                           |
| Needle type            |                       |                           |                             |
| FNA                    | 2                     | 1                         | 1                           |
| FNB                    | 36                    | -                         | -                           |
| Needle gauge           |                       |                           |                             |
| 25G                    | 4                     | 1                         | 1                           |
| 22G                    | 34                    | -                         | -                           |
| Number of punctures    |                       |                           |                             |
| 1 time                 | 7                     | 1                         | 1                           |
| 2 times                | 26                    | 2.6 (0.37-18.25)          | 1.10 (0.05-24.77)           |
| 3 times                | 5                     | -                         | -                           |
| Puncture site          |                       |                           |                             |
| Transgastric           | 31                    | 1                         | 1                           |
| Transduodenal bulb     | 1                     | -                         | -                           |
| Transduodenal 2nd part | 6                     | 0.2 (0.03-1.24)           | -                           |

EUS-TA, endoscopic ultrasound-guided tissue acquisition; FNA, fine-needle aspiration; FNB, fine-needle biopsy; OR, odds ratio; p-NET, pancreatic neuroendocrine tumor; 95% CI, 95% confidence interval.

## Supplementary material

**Supplementary Table 3** Sensitivity of EUS-TA for surgically resected p-NEN.

| <b>Tumor size</b> | <b>Total (n)</b> | <b>True positive (n)</b> | <b>False negative (n)</b> | <b>Sensitivity (%) (95% CI)</b> |
|-------------------|------------------|--------------------------|---------------------------|---------------------------------|
| Overall           | 52               | 48                       | 4                         | 92.3 (81.3-97.5)                |
| ≤ 10 mm           | 22               | 21                       | 1                         | 95.5 (76.5-99.9)                |
| 10-20 mm          | 18               | 17                       | 1                         | 94.4 (72.4-99.9)                |
| > 20 mm           | 12               | 10                       | 2                         | 83.3 (54.0-96.5)                |

EUS-TA, endoscopic ultrasound-guided tissue acquisition; p-NEN, pancreatic neuroendocrine neoplasm; 95% CI, 95% confidence interval.
